# Supplementary material
Source: publisher figshare collection journal article supplement (https://acs.figshare.com/ndownloader/files/3776080)
Supplement: Supplementary file 1 [file 3776080]

# Supporting information: Adsorption properties of triethylene glycol on a hydrated {10 $\bar{1}$ 4} calcite surface and its effect on adsorbed water

Richard Olsen,\* Kim N. Leirvik, Bjørn Kvamme, and Tatiana Kuznetsova

Department of Physics and Technology, University of Bergen, Allégaten 55, 5007 Bergen, Norway

Received July 9, 2015; E-mail: richard.olsen@ift.uib.no

**Table S1.** Lennard-Jones parameters  $\sigma$  and  $\epsilon$ , masses  $m$  and charges  $q$  for the OPLS-AA TEG molecule.

| Atom | $\sigma$<br>[Å] | $\epsilon$<br>[kJ/mol] | $m$<br>[u] | $q$<br>[e] |
|------|-----------------|------------------------|------------|------------|
| HO   | 0.000           | 0.000                  | 1.0008     | 0.435      |
| OH   | 3.070           | 0.711                  | 15.9994    | -0.700     |
| CT1  | 3.500           | 0.276                  | 12.0107    | 0.145      |
| CT2  | 3.500           | 0.276                  | 12.0107    | 0.140      |
| HC1  | 2.500           | 0.126                  | 1.0008     | 0.060      |
| HC2  | 2.500           | 0.126                  | 1.0008     | 0.030      |
| OS   | 2.900           | 0.586                  | 15.9994    | -0.400     |

**Table S2.** Bond stretching parameters for the OPLS-AA TEG molecule.

| Bond  | $K^r$ [kJ·Å <sup>-2</sup> /mol] | $r_0$ [Å] |
|-------|---------------------------------|-----------|
| HO-OH | 2313.752                        | 0.945     |
| OH-CT | 1338.880                        | 1.410     |
| CT-HC | 1422.560                        | 1.090     |
| CT-CT | 1121.312                        | 1.529     |
| CT-OS | 1338.880                        | 1.410     |

**Table S3.** Covalent angle parameters for the OPLS-AA TEG molecule.

| Angle    | $K^\theta$ [kJ·rad <sup>-2</sup> /mol] | $\theta_0$ [°] |
|----------|----------------------------------------|----------------|
| HO-OH-CT | 230.120                                | 108.5          |
| HC-CT-OH | 146.440                                | 109.5          |
| HC-CT-HC | 138.072                                | 107.8          |
| HC-CT-CT | 156.900                                | 110.7          |
| HC-CT-OS | 146.440                                | 109.5          |
| CT-CT-OS | 209.200                                | 109.5          |
| CT-CT-OH | 209.200                                | 109.5          |
| CT-OS-CT | 251.040                                | 109.5          |

**Table S4.** Dihedral angle parameters for the OPLS-AA TEG molecule ( $V_4 = 0$ , Cx can be replaced by any carbon atom type).

| Dihedral    | $V_1$<br>[kJ/mol] | $V_2$<br>[kJ/mol] | $V_3$<br>[kJ/mol] |
|-------------|-------------------|-------------------|-------------------|
| HO-OH-CT-HC | 0.0000            | 0.0000            | 1.4744            |
| HO-OH-CT-CT | -1.4895           | -0.7280           | 2.0585            |
| HC-CT-CT-HC | 0.0000            | 0.0000            | 1.2552            |
| HC-CT-CT-OS | 0.0000            | 0.0000            | 1.9581            |
| HC-CT-CT-OH | 0.0000            | 0.0000            | 1.9581            |
| HC-CT-OS-Cx | 0.0000            | 0.0000            | 3.1798            |
| CT-CT-OS-CT | 2.7196            | -1.0460           | 2.8033            |
| OH-CT-CT-OS | 18.0707           | 0.0000            | 0.0000            |
| OS-CT-CT-OS | -2.3012           | 0.0000            | 0.0000            |

**Table S5.** Parameters of the flexible SPC water model ( $r_{1,0}$ ,  $r_{2,0}$  and  $r_{3,0}$  are equilibrium bond lengths and atomic separations).

| Parameter                   | Value    | Unit                    |
|-----------------------------|----------|-------------------------|
| H-O $r_{1,0}$ and $r_{2,0}$ | 1.000    | Å                       |
| H-H $r_{3,0}$               | 1.633    | Å                       |
| Dissociation energy $D_m$   | 426.702  | kJ/mol                  |
| Coefficient $\rho_m$        | 2.566    | Å <sup>-1</sup>         |
| Coefficient $c$             | -884.630 | kJ·Å <sup>-2</sup> /mol |
| Coefficient $b$             | 687.410  | kJ·Å <sup>-2</sup> /mol |
| Coefficient $d$             | 467.310  | kJ·Å <sup>-2</sup> /mol |

## Force-field parameters

In the following subsections we have listed force-field parameters used in our work. OPLS<sup>1-11</sup> was used to model TEG-TEG and TEG-water interactions. Calcite Buckingham parameters<sup>12</sup> were fitted to Lennard-Jones potentials and mixing rules were applied to find Lennard-Jones pair parameters for TEG-calcite interactions. Water-water and water-TEG interactions were modelled using the fSPC<sup>13</sup> force-field while water-calcite interactions were modelled using Buckingham parameters from the literature.

## TEG force-field

Lennard-Jones parameters and charges of the TEG model are shown in Tab. S1, while bond-stretching parameters are shown in Tab. S2. A TEG molecule has 40 covalent angles and 45 dihedral angles. The types of covalent angles and dihedral angles that occur in the TEG model are shown in Tab. S3 and Tab. S4 together with the assigned force-field parameters. See Fig. 1 in paper for naming convention of atomic types.

## Water force-field

The flexible SPC parameters used for water are shown in Tab. S5. Oxygen Lennard-Jones parameters are  $\sigma_O = 3.1656$ Å, and  $\epsilon_O = 0.6502$ kJ/mol. Hydrogen atoms are not

involved in short range interactions. As such,  $\epsilon_H = 0$  and  $\sigma_H = 0$ . Partial charges, responsible for long range Coulomb interactions, are  $q_H = +0.41$  and  $q_O = -0.82$  for hydrogen and oxygen atoms, respectively.

## Calcite force-field

Buckingham parameters for calcite are shown in Tab. S6. Partial charges used in long range Coulomb interactions towards H<sub>2</sub>O and TEG were set to  $q_{Ca} = +1.881$ ,  $q_C = +1.482$  and  $q_O = -1.118$ .

**Table S6.** Buckingham parameters  $A$  and  $\rho$ , used in calcite-calcite and calcite-water interactions.

| Atom | $A$<br>[kJ/mol] | $\rho$<br>[Å] | $C$<br>[kJ·Å <sup>6</sup> /mol] |
|------|-----------------|---------------|---------------------------------|
| Ca   | 82942.86        | 0.455         | 55686.70                        |
| O    | 230230.10       | 0.253         | 1123.56                         |
| C    | 369822.70       | 0.278         | 2432.71                         |

**Table S7.** Buckingham parameters  $A$  and  $\rho$ , used in calcite-water interactions.

| Interaction | $A$<br>[kJ/mol] | $\rho$<br>[Å] | $C$<br>[kJ·Å <sup>6</sup> /mol] |
|-------------|-----------------|---------------|---------------------------------|
| O           | 2196380.310     | 0.1490        | 2894.402                        |
| H           | 665.539         | 0.4195        | 0.000                           |

## Water-calcite force-field

Pure Buckingham parameters for water are listed in Tab. S7. These were used to obtain cross interactions towards calcite from the geometric mixing rules  $A_{ij} = \sqrt{A_i A_j}$ ,  $\rho_{ij} = \sqrt{\rho_i \rho_j}$  and  $C_{ij} = \sqrt{C_i C_j}$ .

## Non-bonded energy distributions

In addition to investigating geometric positioning of TEG hydroxyls towards calcite we looked at the distribution of non-bonded energies (described by Eq. (1) of paper) towards calcite (in the system containing a single TEG molecule adsorbed to the hydrated surface). Fig. S1 shows energy distributions (normalized to unity) of contributions from interactions between hydroxyl hydrogens of TEG and closest carbon of carbonate, hydroxyl hydrogen of TEG and closest oxygen of carbonate, hydroxyl oxygen of TEG and closest carbon of carbonate, as well as between hydroxyl oxygen of TEG and closest calcium of calcite. These energies separately have large magnitudes (for comparison, O-H bond energies of water are in the order of 427kJ/mol, while hydrogen bonds between water is in order of 25kJ/mol.<sup>14</sup>). However, it can be seen that the energies were centred around both positive and negative energies and, as is discussed in paper, adsorption energies were found to be sensible.

## Effect of calcite slab reduction

Equivalent simulations were also performed on systems where the calcite slab was replaced by a slab of dimension 40Å×44Å×7.6Å. We observed no change in the first and second water density peaks. For no TEG and one TEG, the water density profiles were identical to those of the large calcite slab. Since for more than 16 TEG the final adsorbed amount of TEG differed from the amounts seen on the larger calcite slab the third and fourth water density peaks were different, but within the same range. The overall behaviour of TEG, as seen in Fig. 5 in paper, did not change with the reduced calcite slab. Furthermore, distances and angles

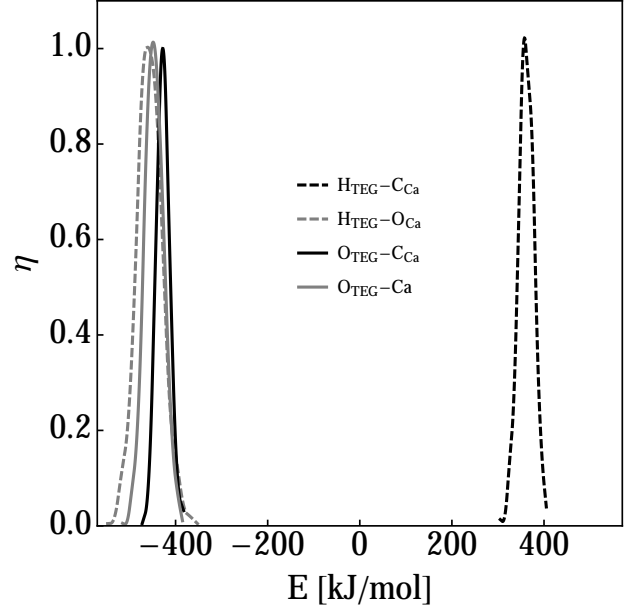

**Figure S1.** Normalized distribution for system with one TEG at 298K of hydroxyl hydrogen - calcite carbon ( $H_{\text{TEG-C}_{\text{Ca}}}$ ) non-bonded energy, hydroxyl hydrogen - calcite oxygen ( $H_{\text{TEG-O}_{\text{Ca}}}$ ) non-bonded energy, hydroxyl oxygen - calcite carbon ( $O_{\text{TEG-C}_{\text{Ca}}}$ ) non-bonded energy and hydroxyl oxygen - calcite calcium ( $O_{\text{TEG-Ca}}$ ) non-bonded energy. Also see  $d_1$ ,  $d_2$ ,  $d_3$  and  $d_4$  of Fig. 6(b) in paper, respectively.

listed in Tab. 1(I) and Tab. 1(II) in paper overlapped, within given standard deviations, with those found using a thinner calcite slab (i.e.  $\{v_1 \pm \sigma_1\} \cap \{v_2 \pm \sigma_2\} \neq \emptyset$ ).

## Free energy based on density

Let  $\mathcal{A}$  be a system consisting of a hydrated calcite slab with  $\rho_{\text{ads}}$  adsorbed TEG, and let  $z$  denote the distance from a calcium atom at the  $\{10\bar{1}4\}$  calcite surface to water molecule index  $M$ , in the water phase, projected along the  $z$ -axis (normal to the calcite surface). The partition function describing all possible states in phase-space where water molecule  $M$  is located at  $z$  is

$$Q_{\mathcal{A}}(z, \rho_{\text{ads}}) = C \int \prod_{i=1}^{N_w} d\mathbf{r}_i^w \prod_{j=1}^{N_t} d\mathbf{r}_j^t \prod_{k=1}^{N_{\text{cal}}} d\mathbf{r}_k^{\text{cal}} \times \prod_{\mu=3M+1}^{3M+3} \delta(\mathbf{r}_\mu^w - \mathbf{r}_\mu^{w,0}(z)) e^{-\beta \Phi(\rho_{\text{ads}}, \mathbf{r}_1^w, \dots, \mathbf{r}_{N_{\text{cal}}}^{\text{cal}})},$$

where w, t, and cal denote water, TEG, and calcite, respectively,  $N_n$  is number of atoms,  $\mathbf{r}_\mu^{w,0}(z)$  is constrained position of water atom  $\mu$  to  $z$ , and  $\Phi$  is the potential part of complete system Hamiltonian.  $C$  is the standard normalization due to kinetic part of Hamiltonian, adjustment of over-counting (i.e. indistinguishability of particles) and due to quantum correction coming from the Heisenberg uncertainty relation.

A free energy difference between water  $M$  at  $z$  and water

$M$  at  $z_0$  is now described by

$$\begin{aligned}\Delta A_{\text{H}_2\text{O}}(z, \rho_{\text{ads}}) &= -RT \ln \left[ \frac{Q_{\mathcal{A}}(z, \rho_{\text{ads}})}{Q_{\mathcal{A}}(z_0, \rho_{\text{ads}})} \right] \\ &= -RT \ln \left[ \frac{\langle \delta(\mathbf{r}_{\mu}^{\text{w}} - \mathbf{r}_{\mu}^{\text{w},0}(z)) \rangle}{\langle \delta(\mathbf{r}_{\mu}^{\text{w}} - \mathbf{r}_{\mu}^{\text{w},0}(z_0)) \rangle} \right] \\ &= -RT \ln \left[ \frac{P(z, \rho_{\text{ads}})}{P(z_0, \rho_{\text{ads}})} \right],\end{aligned}$$

where  $P(z, \rho_{\text{ads}})$  is the probability of water  $M$  being present at  $z$  with adsorbed TEG density  $\rho_{\text{ads}}$ . Since this probability is also proportional to the density  $\rho_{\text{H}_2\text{O}}(z, \rho_{\text{ads}})$  we can find the free energy difference,  $\Delta A_{\text{H}_2\text{O}}$ , between water at  $z$  and water in bulk by<sup>15</sup>

$$\Delta A_{\text{H}_2\text{O}}(z, \rho_{\text{ads}}) = -RT \ln \left[ \frac{\rho_{\text{H}_2\text{O}}(z, \rho_{\text{ads}})}{\rho_{\text{H}_2\text{O}}^{\text{bulk}}} \right].$$

---

## References

- (1) Jorgensen, W. L.; Maxwell, D. S.; Tirado-Rives, J. *J. Am. Chem. Soc.* **1996**, *118*, 11225–11236.
- (2) Jorgensen, W. L.; McDonald, N. A. *J. Mol. Struct. (theochem)* **1998**, *424*, 145–155.
- (3) McDonald, N. A.; Jorgensen, W. L. *J. Phys. Chem. B* **1998**, *102*, 8049–8059.
- (4) Damm, W.; Frontera, A.; Tirado-Rives, J.; Jorgensen, W. L. *J. Comput. Chem.* **1997**, *18*, 1955–1970.
- (5) Rizzo, R. C.; Jorgensen, W. L. *J. Am. Chem. Soc.* **1999**, *121*, 4827–4836.
- (6) Watkins, E. K.; Jorgensen, W. L. *J. Phys. Chem. A* **2001**, *105*, 4118–4125.
- (7) Price, M. L. P.; Ostrovsky, D.; Jorgensen, W. L. *J. Comput. Chem.* **2001**, *22*, 1340–1352.
- (8) Jorgensen, W. L.; Ulmschneider, J. P.; Tirado-Rives, J. *J. Phys. Chem. B* **2004**, *108*, 16264–16270.
- (9) Jensen, K. P.; Jorgensen, W. L. *J. Chem. Theory Comput.* **2006**, *2*, 1499–1509.
- (10) Jorgensen, W. L.; Madura, J. D.; Swenson, C. J. *J. Am. Chem. Soc.* **1984**, *106*, 6638–6646.
- (11) Jorgensen, W. L.; Tirado-Rives, J. *J. Am. Chem. Soc.* **1988**, *110*, 1657–1666.
- (12) Cuong, P. V.; Kvamme, B.; Kuznetsova, T.; Jensen, B. *International Journal of Energy and Environment* **2012**, *6*, 301–309.
- (13) Toukan, K.; Rahman, A. *Phys. Rev. B* **1985**, *31*, 2643–2648.
- (14) Ben-Naim, A. *Molecular Theory of Water and Aqueous Solutions*; World Scientific, 2009.
- (15) Marrink, S.-J.; Berendsen, H. J. C. *J. Phys. Chem.* **1994**, *98*, 4155–4168.
